# Supplementary material for: Fractional Flow Reserve-Guided Stent Optimisation in Focal and Diffuse Coronary Artery Disease
Source: MDPI journal article supplement (doi:10.3390/diagnostics13152612), 2023-08-07
Supplement: s1 [file s1]

## **Supplemental Material**

### **Table of contents**

**Table S1.** Inclusion criteria/exclusion criteria in TARGET FFR trial.

**Table S2.** Comparison of functional characteristics between focal and diffuse coronary artery disease (CAD).

**Table S3.** Multivariate regression of post-PCI fractional flow reserve (FFR) with pullback pressure gradient (PPG).

**Table S4.** Comparison of fractional characteristics between focal and diffuse coronary artery disease in patients with additional optimization.

### **Figure of contents**

**Figure S1.** Physiology-guided incremental optimization strategy.

**Figure S2.** Study flowchart

**Figure S3.** Final post-PCI fractional flow reserve (FFR) stratified by randomization arm and PPG defined focal or diffuse disease.

**Figure S4.** The rate of optimal post-PCI fractional flow reserve (FFR) ( $\geq 0.90$ ) stratified by randomization arm and coronary artery disease.

**Table S1.** Inclusion criteria/exclusion criteria in the TARGET FFR study

| Inclusion criteria                                                                                                                                                                                                                                                                                                                                                                                                                                                               |
|----------------------------------------------------------------------------------------------------------------------------------------------------------------------------------------------------------------------------------------------------------------------------------------------------------------------------------------------------------------------------------------------------------------------------------------------------------------------------------|
| Patients >18 years of age with coronary artery disease including stable angina and NSTEMI                                                                                                                                                                                                                                                                                                                                                                                        |
| Participants must be able to provide informed consent                                                                                                                                                                                                                                                                                                                                                                                                                            |
| Exclusion criteria                                                                                                                                                                                                                                                                                                                                                                                                                                                               |
| PCI in a coronary artery bypass graft                                                                                                                                                                                                                                                                                                                                                                                                                                            |
| <ul style="list-style-type: none"><li>• PCI to an ISR lesion</li><li>• PCI to a target artery providing Rentrop grade 2 or 3 collateral blood supply to another vessel</li><li>• Inability to receive adenosine (eg, severe reactive airway disease, marked hypotension, or advanced atrioventricular block without pacemaker).</li><li>• Recent (within 1 week prior to cardiac catheterisation) STEMI in any arterial distribution (not specifically target lesion).</li></ul> |
| Severe cardiomyopathy (LVEF <30%)                                                                                                                                                                                                                                                                                                                                                                                                                                                |
| <ul style="list-style-type: none"><li>• Renal insufficiency such that an additional 20 to 30 mL of contrast would, in the opinion of the operator, pose unwarranted risk to the patient.</li></ul>                                                                                                                                                                                                                                                                               |

ISR = in-stent restenosis; LVEF = left ventricular ejection fraction; PCI = percutaneous coronary intervention; STEMI = ST-elevated myocardial infarction; PPG = pullback pressure gradient.

**Table S2.** Comparison of functional characteristics between focal and diffuse coronary artery disease (CAD)

| Variables                           | Focal CAD         | Diffuse CAD       | P      |
|-------------------------------------|-------------------|-------------------|--------|
| N                                   | 38                | 76                |        |
| Physiological characteristics       |                   |                   |        |
| Pre PCI Pd/Pa, median [IQR]         | 0.87 [0.74, 0.95] | 0.85 [0.79, 0.88] | 0.21   |
| Pre PCI CFR, median [IQR]           | 1.87 [1.40, 2.15] | 2.25 [1.48, 2.71] | 0.052  |
| Pre PCI IMR, median [IQR]           | 24.5 [19.5, 33.9] | 21.7 [16.6, 31.2] | 0.36   |
| Pre PCI FFR, median [IQR]           | 0.61±0.16         | 0.62±0.13         | 0.73   |
| Final Post PCI Pd/Pa, median [IQR]  | 0.98 [0.95, 1.01] | 0.91 [0.89, 0.93] | <0.001 |
| Final Post PCI CFR, median [IQR]    | 3.64 [2.47, 5.51] | 3.05 [2.10, 4.13] | 0.004  |
| Final Post PCI IMR, median [IQR]    | 14.4 [11.5, 19.2] | 17.3 [13.0, 23.5] | 0.052  |
| Final Post PCI FFR, mean ± SD       | 0.90±0.07         | 0.83±0.07         | <0.001 |
| Normalised delta FFR (%), mean ± SD | 72.0 ± 20.3       | 52.5 ± 19.2       | <0.001 |
| Final FFR ≤ 0.80 (%), n (%)         | 5 (13.2)          | 22 (28.9)         | 0.10   |
| Final FFR ≥ 0.80 (%), n (%)         | 34 (89.5)         | 54 (71.1)         | 0.048  |
| Final FFR ≥ 0.90 (%), n (%)         | 20 (52.6)         | 12 (15.8)         | <0.001 |
| PPG, median [IQR]                   | 0.81 [0.78, 0.82] | 0.58 [0.49, 0.66] | <0.001 |

Categorical variables are expressed as number and percentage. Continuous variables are indicated as median (interquartile range). CFR = coronary flow reserve; FFR = fractional flow reserve; IMR = index of microvascular resistance; Pa = aortic pressure; Pd = distal coronary pressure; PPG = pullback pressure gradient.

Normalised delta FFR was normalised by pre-PCI FFR ([final post-PCI FFR minus pre-PCI FFR divided by one minus pre-PCI FFR] by a factor of one hundred).

**Table S3.** Multivariate regression analyses of post-PCI FFR with pullback pressure gradient (PPG).

| Variables     | Multivariate analysis |                 |         |
|---------------|-----------------------|-----------------|---------|
|               | Estimate              | CI              | P value |
| Age           | -0.001                | [-0.002, 0.001] | 0.36    |
| Gender (male) | -0.035                | [-0.070, 0.000] | 0.051   |
| Renal failure | -0.003                | [-0.080, 0.074] | 0.93    |
| Hypertension  | 0.005                 | [-0.020, 0.030] | 0.69    |
| Diabetes      | -0.018                | [-0.049, 0.014] | 0.27    |
| Pre-PCI FFR   | 0.175                 | [0.084, 0.266]  | <0.001  |
| PPG           | 0.24                  | [0.153, 0.328]  | <0.001  |
| PIOS          | 0.006                 | [-0.019, 0.031] | 0.63    |

PCI = percutaneous coronary intervention; FFR = fractional flow reserve; PPG = pullback pressure gradient, PIOS = physiology-guided incremental optimisation strategy.

**Table S4.** Comparison of fractional characteristics between focal and diffuse CAD in patients with additional optimisation.

| Variables                       | Focal CAD         | Diffuse CAD       | P    |
|---------------------------------|-------------------|-------------------|------|
| N                               | 1                 | 18                |      |
| Pre PCI                         |                   |                   |      |
| Pre-PCI Pd/Pa, median [IQR]     | 0.83 [0.83, 0.83] | 0.86 [0.82, 0.88] | 0.86 |
| Pre-PCI CFR, median [IQR]       | 2.00 [2.00, 2.00] | 2.35 [1.57, 2.61] | 0.63 |
| Pre-PCI IMR, median [IQR]       | 20.6              | 26.5±7.39         | NA   |
| FFR Pre PCI, median [IQR]       | 0.61 [0.61, 0.61] | 0.64 [0.56, 0.67] | 0.72 |
| PPG, mean ± SD                  | 0.74              | 0.56±0.10         | NA   |
| Immediately after stenting      |                   |                   |      |
| Pd/Pa, median [IQR]             | 0.89 [0.89, 0.89] | 0.90 [0.88, 0.91] | 0.62 |
| CFR, median [IQR]               | 2.06 [2.06, 2.06] | 2.51 [2.05, 3.81] | 0.47 |
| IMR, median [IQR]               | 31.5 [31.5, 31.5] | 22.4 [17.8, 27.1] | 0.27 |
| FFR, median, mean ± SD          | 0.80              | 0.76±0.09         | NA   |
| 1 <sup>st</sup> PIOS treatments |                   |                   |      |
| Pd/Pa, median [IQR]             | 0.89 [0.89, 0.89] | 0.90 [0.90, 0.92] | 0.19 |
| CFR, median [IQR]               | 3.59 [3.59, 3.59] | 3.91 [3.17, 5.58] | 0.45 |
| IMR, mean ± SD                  | 17.4              | 20.0±7.67         | NA   |
| FFR, mean ± SD                  | 0.81              | 0.83±0.05         | NA   |
| 2 <sup>nd</sup> PIOS treatments |                   |                   |      |
| Pd/Pa, median [IQR]             | 0.89 [0.89, 0.89] | 0.91 [0.90, 0.92] | 0.14 |
| CFR, median [IQR]               | 3.59 [3.59, 3.59] | 3.76 [2.69, 4.95] | 0.59 |
| IMR, mean ± SD                  | 15.3±2.96         | 20.2±7.52         | NA   |
| FFR, mean ± SD                  | 0.81              | 0.83±0.05         | NA   |
| Final coronary physiology       |                   |                   |      |
| Pd/Pa, median [IQR]             | 0.89 [0.89, 0.89] | 0.91 [0.90, 0.92] | 0.14 |
| CFR, median [IQR]               | 3.59 [3.59, 3.59] | 3.76 [2.69, 4.95] | 0.59 |
| IMR, mean ± SD                  | 17.4              | 20.0±7.67         | NA   |
| FFR, mean ± SD                  | 0.81              | 0.83±0.05         | NA   |

Categorical variables are expressed as number and percentage. Continuous variables are indicated as median (interquartile range). CAD = coronary artery disease; CFR = coronary flow reserve; FFR = fractional flow reserve; IMR = index of microvascular resistance; Pa = aortic pressure; Pd = distal coronary pressure; PPG = pullback pressure gradient.

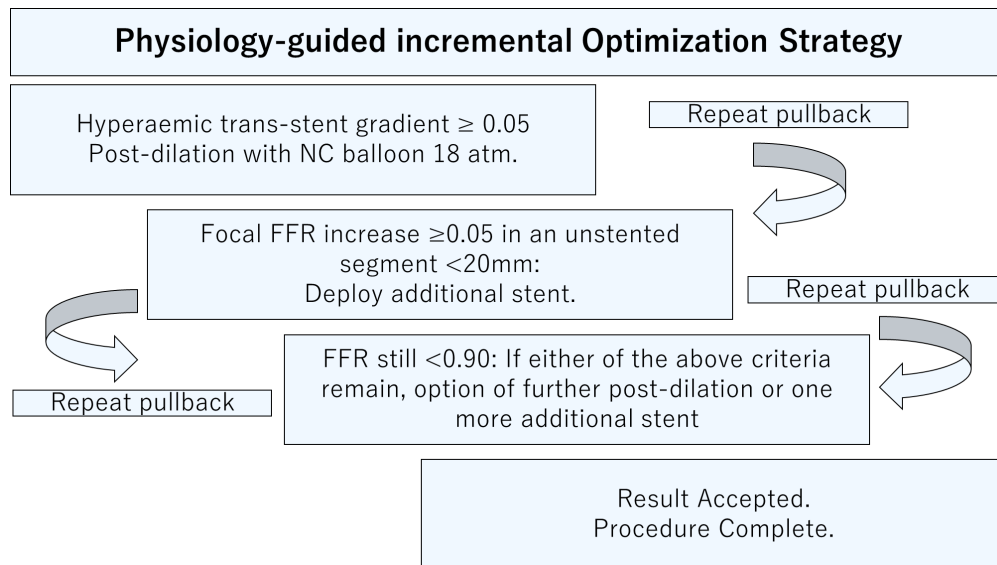

**Figure S1.** Physiology-guided incremental optimization strategy. FFR = fractional flow reserve; NC balloon = non-complainant balloon.

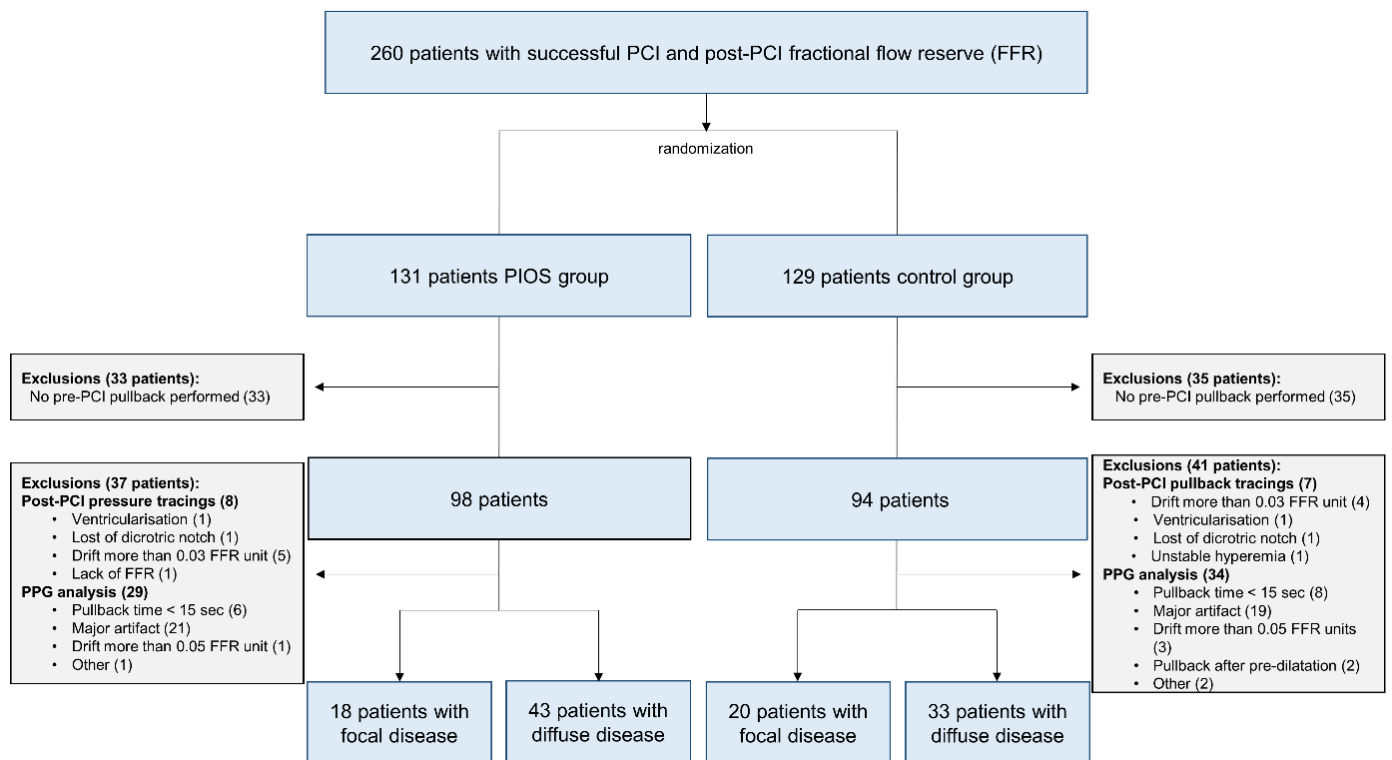

**Figure S2.** Study flowchart. Focal is defined as  $PPG \geq 0.74$  and diffuse as  $PPG < 0.74$ . FFR = fractional flow reserve; PCI = percutaneous coronary intervention; PIOS = physiology-guided incremental optimisation strategy; PPG = pullback pressure gradient;

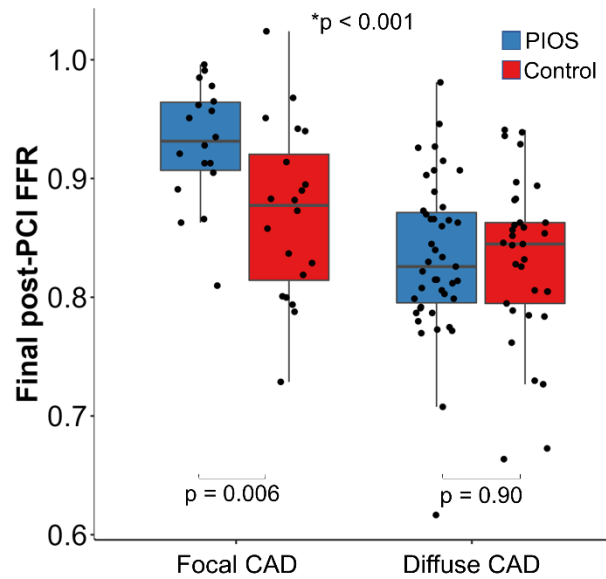

**Figure S3.** Final post-PCI fractional flow reserve (FFR) stratified by randomization arm and PPG defined focal or diffuse disease.

There was a significant difference in final post-PCI FFR between the focal PIOS, diffuse PIOS, focal control, and diffuse control groups. ( $0.93 \pm 0.05$  focal PIOS vs  $0.87 \pm 0.07$  focal controls vs  $0.83 \pm 0.07$  diffuse PIOS vs  $0.83 \pm 0.07$  diffuse controls;  $p\text{-value} < 0.001$ )

The left side panel shows focal disease stratified by randomized arm (PIOS in blue and controls in red). In patients with focal CAD, there was a significant difference in final post-PCI FFR between randomization arms. The right side panel shows diffuse disease (PIOS in blue and controls in red) with no significant difference in final post-PCI FFR between randomization arms. Focal CAD defined as  $\text{PPG} \geq 0.74$ . \*Focal CAD PIOS vs. Diffuse CAD PIOS vs. Focal CAD Controls vs. Diffuse CAD Controls group.

CAD = coronary artery disease; FFR = fractional flow reserve; PCI = percutaneous coronary intervention; PIOS = physiology-guided incremental optimisation strategy;



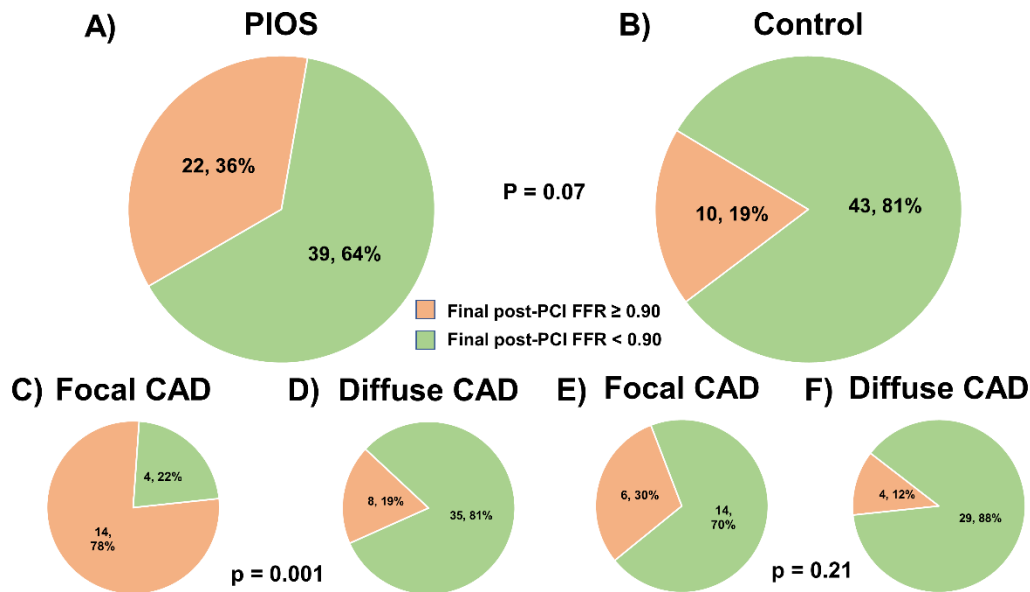

**Figure S4.** The rate of optimal final post-PCI FFR ( $\geq 0.90$ ) stratified by randomization arm and focal or diffuse coronary artery disease. Panel A showed the proportion of patients achieving final post-PCI FFR  $\geq 0.90$  in PIOS group. Panel B showed the proportion of patients achieving final post-PCI FFR  $\geq 0.90$  in control group. Panel C showed the proportion of patients achieving final post-PCI FFR  $\geq 0.90$  in focal PIOS group. Panel D showed the proportion of patients achieving final post-PCI FFR  $\geq 0.90$  in diffuse PIOS group. Panel E showed the proportion of patients achieving final post-PCI FFR  $\geq 0.90$  in focal control group. Panel F showed the proportion of patients achieving final post-PCI FFR  $\geq 0.90$  in diffuse control group. CAD = coronary artery disease; FFR = fractional flow reserve; PCI = percutaneous coronary intervention; PIOS = physiology-guided incremental optimisation strategy.
